# Supplementary figures and images for: The DNA sequence of the human X chromosome
Source: Springer Nature journal article supplement (doi:10.1038/nature03440), 2005-03-01

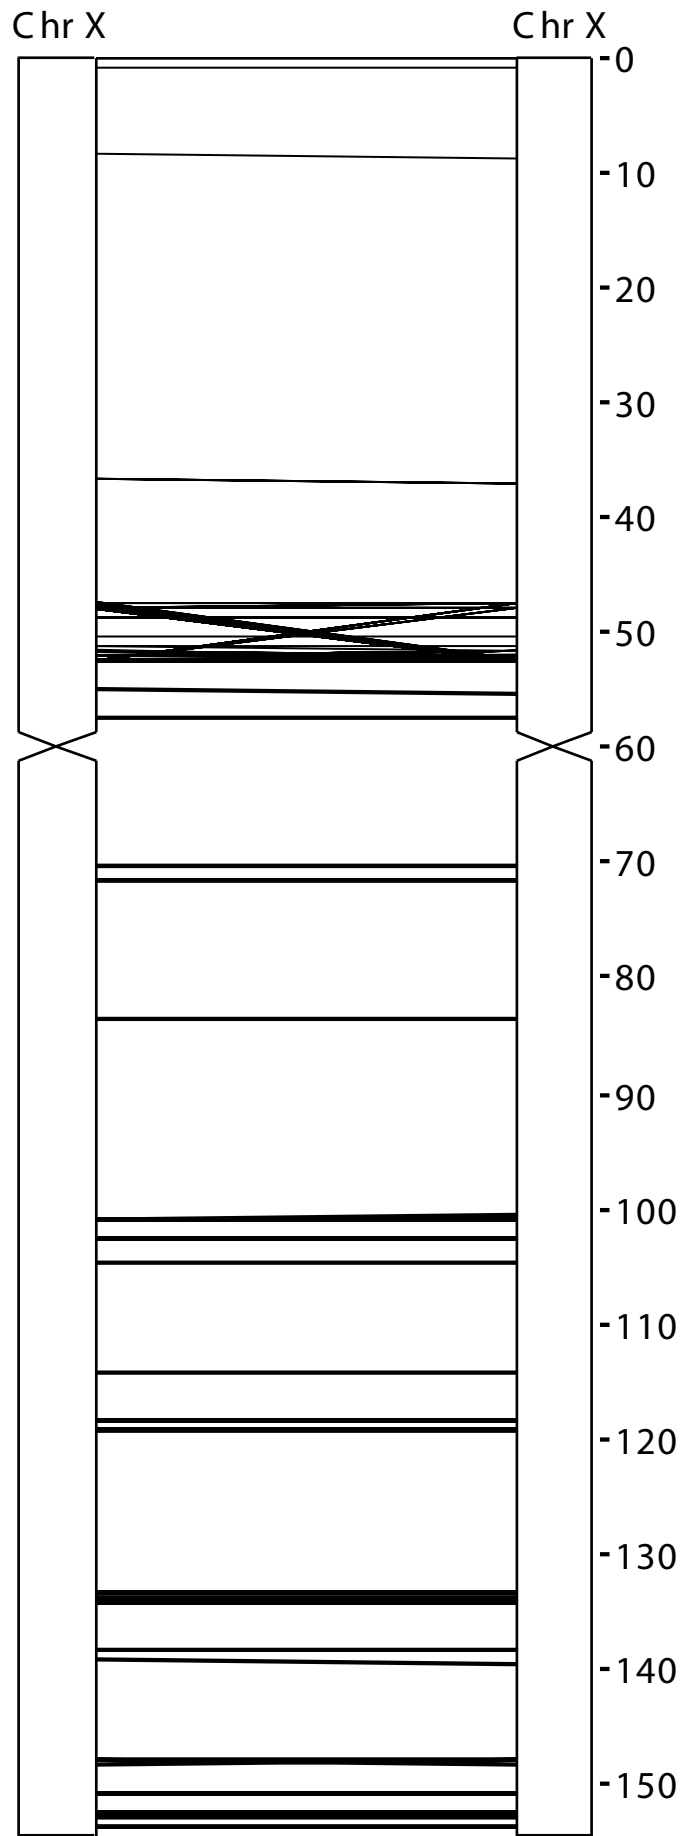

Supplement: nature03440-s2.pdf [file nature03440-s2.pdf]
